# Supplementary material
Source: MDPI journal article supplement (https://www.mdpi.com/2075-163X/11/9/963)
Supplement: s1 [file s1]

# Iron-speciation control of chalcopyrite dissolution from a carbonatite derived concentrate in acidic ferric sulphate media

Kolela J Nyembwe <sup>1</sup>, Elvis Fosso-Kankeu <sup>1,2,\*</sup>, Frans Waanders <sup>1,3</sup> and Martin Mkandawire <sup>1,4,\*</sup>

- <sup>1</sup> Water Pollution Monitoring and Remediation Initiatives Research Group, School of Chemical and Minerals Engineering, Faculty of Engineering, North-West University, South Africa; djosnyembwe@gmail.com; fossoe@unisa.ac.za; frans.waanders@nwu.ac.za; martin\_mkandawire@cbu.ca
  - <sup>2</sup> Department of Electrical and Mining Engineering, College of Science Engineering and Technology, University of South Africa, Florida Science Campus, South Africa; fossoe@unisa.ac.za
  - <sup>3</sup> Centre of Excellence in Carbon-based Fuels, School of Chemical and Minerals Engineering, Faculty of Engineering, North-West University, South Africa;
  - <sup>4</sup> Department of Chemistry, School of Science and Technology, Cape Breton University, Canada; martin\_mkandawire@cbu.ca
- \* Correspondence: fossoe@unisa.ac.za (EF-K); martin\_mkandawire@cbu.ca; Tel.: (MM) +1-902-563-1430

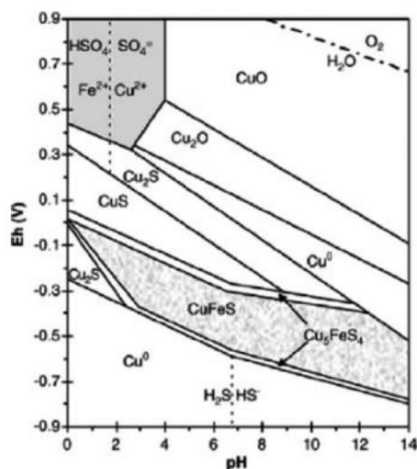

Figure S1: Potential-pH diagram of the Cu-Fe-S-H<sub>2</sub>O system [20]

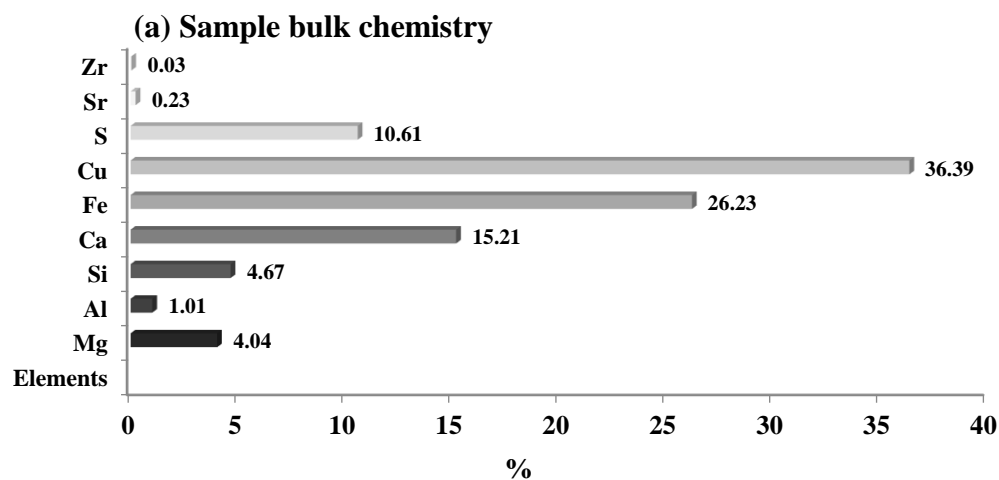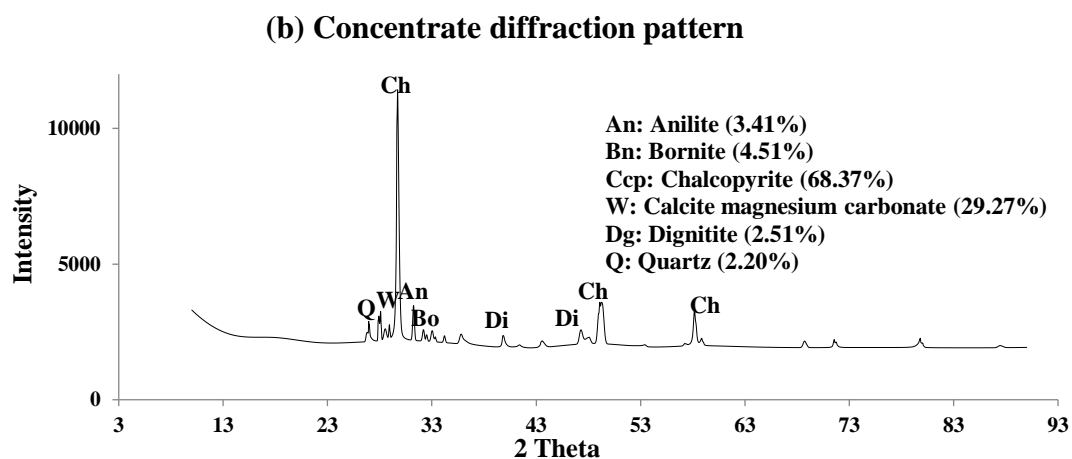

**(C) Surface morphologies and phases**

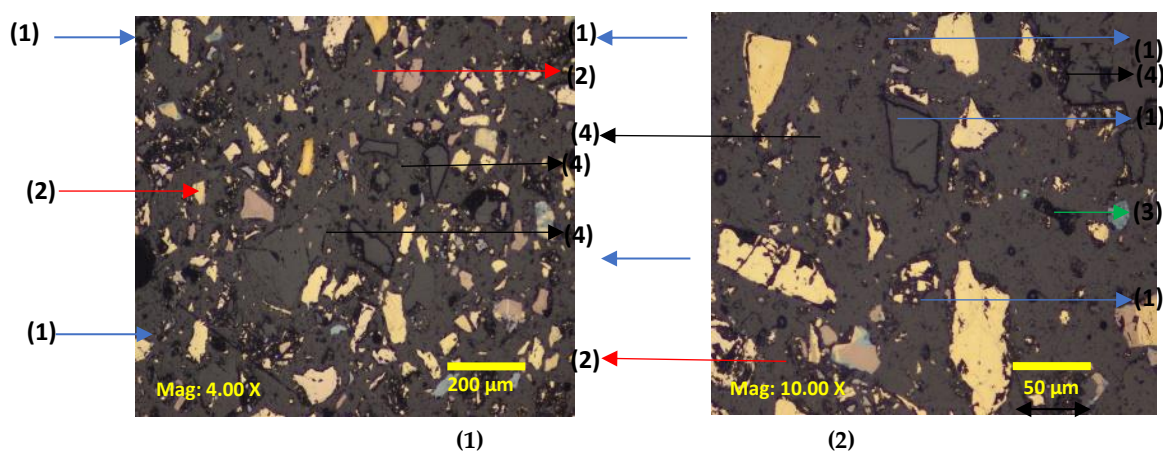

(1): Chacopyrite, (2): bornite (3) dignite and anilite and (4) carbonate

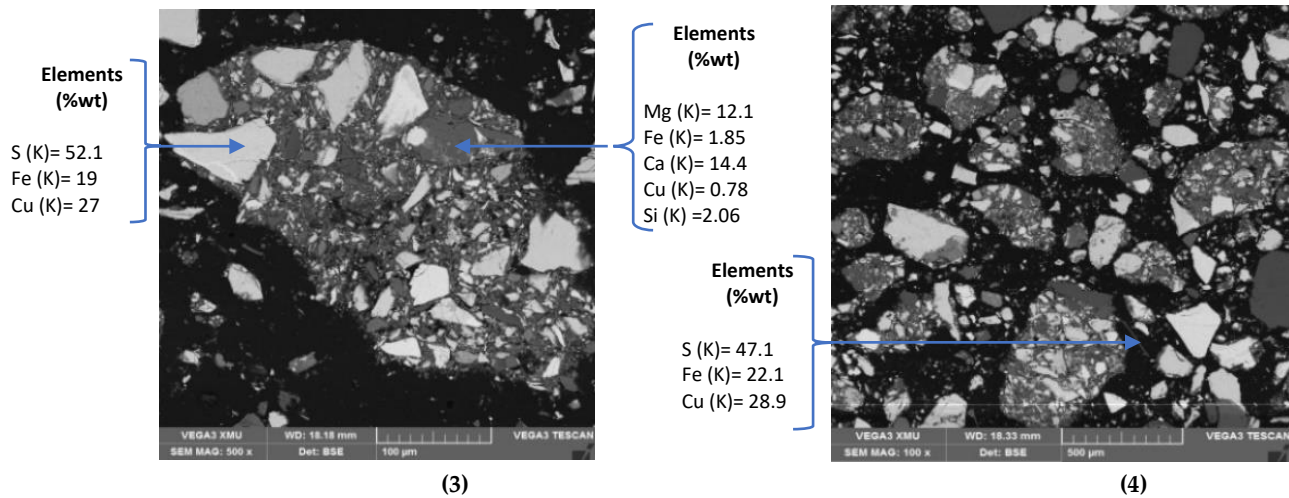

**(d) particle size distribution curve**

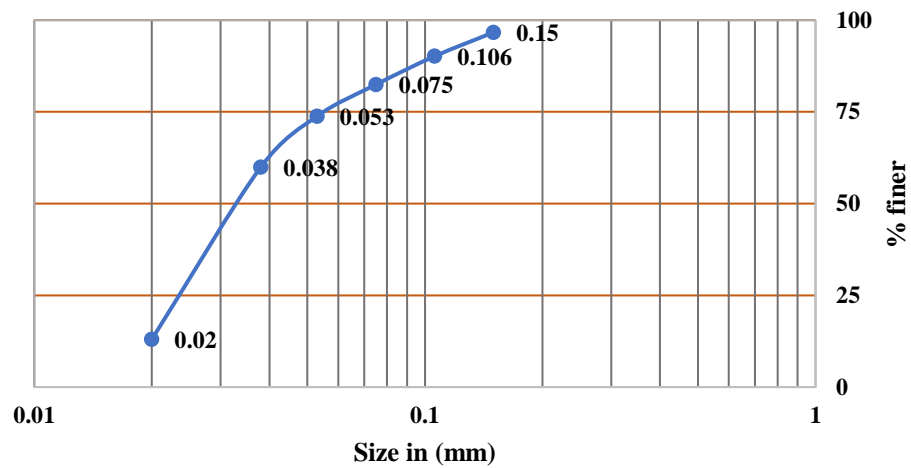

**Figure S2.** (a) Chalcopyrite bulk chemistry, (b) mineral content (c) grain morphology and (d) particle size distribution: A 200 $\mu$ m screen was first used to remove coarse detrimental debris such as woodchip. The cleaned (screen undersize) CuFeS<sub>2</sub> was subjected to a particle size distribution using the following size fractions: -150+106, -106+75, -75+53, -53+38 and -38+20  $\mu$ m. the sieving results showed that 80% of the CuFeS<sub>2</sub> was smaller than 75  $\mu$ m at an average grain size of 32  $\mu$ m.

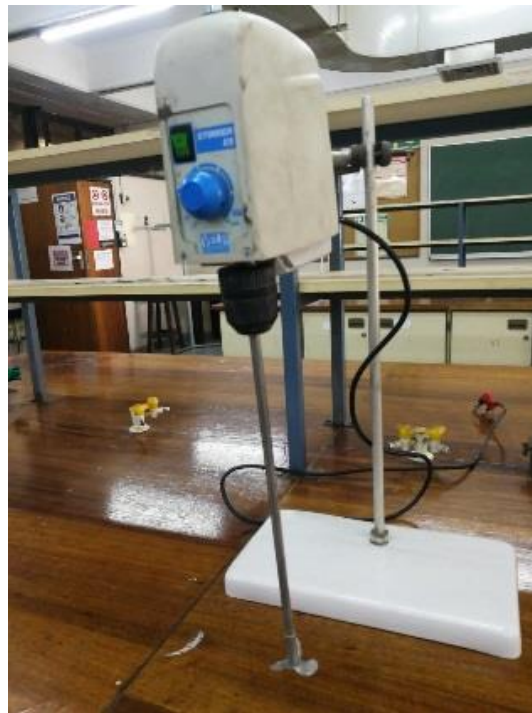

(a)

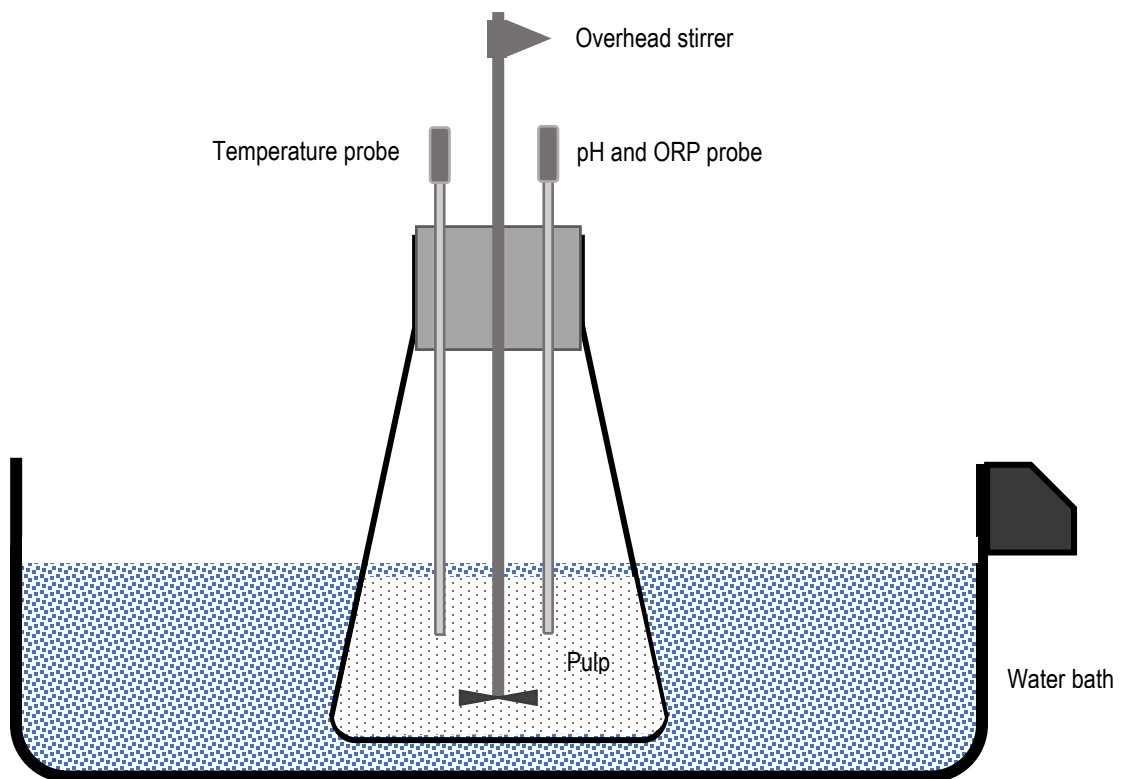

(b)

**Figure S3:** Set up of the leaching experiment (a) picture of the actual overhead stirrer used in the experiments and (b) the illustration of the apparatus set up.

**Table S1.** The thermodynamic functions ( $\Delta G^\circ$  and  $S^\circ$ ) and the equilibrium constants for the various iron species at 25, 35, 50 and 70°C. Source references. [1] [2] [3]

| Formation reaction                                            | $\Delta G^\circ$<br>(KJ/mol) | $\Delta S$<br>(J/mol<br>K) | Log<br>$K_f$<br>25 °C | Log<br>$K_f$<br>35 °C | Log<br>$K_f$<br>50 °C | Log $K_f$<br>70 °C |
|---------------------------------------------------------------|------------------------------|----------------------------|-----------------------|-----------------------|-----------------------|--------------------|
| $H^+ + SO_4^{2-} \rightleftharpoons HSO_4^-$                  | -756.01                      | 131.80                     | 1.98                  | 2.12                  | 2.32                  | 2.64               |
| $Fe^{2+} + H^+ + SO_4^{2-} \rightleftharpoons FeHSO_4^+$      | -841.99                      | 134.19                     | 1.08                  | 1.42                  | ***                   | 2.52               |
| $Fe^{2+} + SO_4^{2-} \rightleftharpoons FeSO_4^0$             | -848.67                      | 3.26                       | 2.25                  | 2.33                  | 2.44                  | 2.63               |
| $Fe^{3+} + 2SO_4^{2-} \rightleftharpoons Fe(SO_4)_2^-$        | -1524.60                     | 423.16                     | 5.38                  | 6.33                  | 7.64                  | 7.48               |
| $Fe^{3+} + H^+ + SO_4^{2-} \rightleftharpoons Fe(HSO_4)^{2+}$ | -775.48                      | 34.97                      | 2.48                  | 2.90                  | ***                   | 4.22               |
| $Fe^{3+} + SO_4^{2-} \rightleftharpoons FeSO_4^+$             | 784.38                       | 5.93                       | 4.04                  | 4.34                  | ***                   | 5.37               |
| $2Fe^{3+} + 3H_2O \rightleftharpoons Fe_2O_3 + 6H^+$          | -742.20                      | 87.40                      | ***                   | ***                   | ***                   | 2.54               |
| $Fe^{3+}$                                                     | -16.70                       | -280.30                    | ***                   | ***                   | ***                   | ***                |
| $Fe^{2+}$                                                     | -91.20                       | -107.10                    | ***                   | ***                   | ***                   | ***                |
